# Supplementary material for: Distinct effect of hierarchical structure on performance of anatase as an anode material for lithium-ion batteries
Source: Royal Society of Chemistry journal article supplement (doi:10.1039/c3ra44731f), 2013-01-01
Supplement: c3ra44731f.pdf [file c3ra44731f.pdf]

## Supplementary Information

### **Distinct effect of hierarchical structure on performance of anatase as an anode material for lithium-ion batteries**

**Yan-Mei Jiang<sup>a</sup>, Kai-Xue Wang<sup>a,\*</sup>, Xing-Xing Guo<sup>a</sup>, Jing-Feng Wang<sup>a</sup>, Hao-Jie  
Zhang<sup>a</sup>, Guo-Dong Li<sup>b</sup>, Jie-Sheng Chen<sup>a,\*</sup>**

*<sup>a</sup> School of Chemistry and Chemical Engineering, Shanghai Jiao Tong University, 800  
Dongchuan Road, Shanghai 200240, China.*

*<sup>b</sup> State Key Laboratory of Inorganic Synthesis and Preparative Chemistry, College of  
Chemistry, Jilin University, Changchun 130012, China*

\* Corresponding authors. Tel.: +86 21 3420 1273; Fax: +86 21 5474 1297. *E-mail address:*

k.wang@sjtu.edu.cn (K. Wang); chemcj@sjtu.edu.cn (J. Chen).

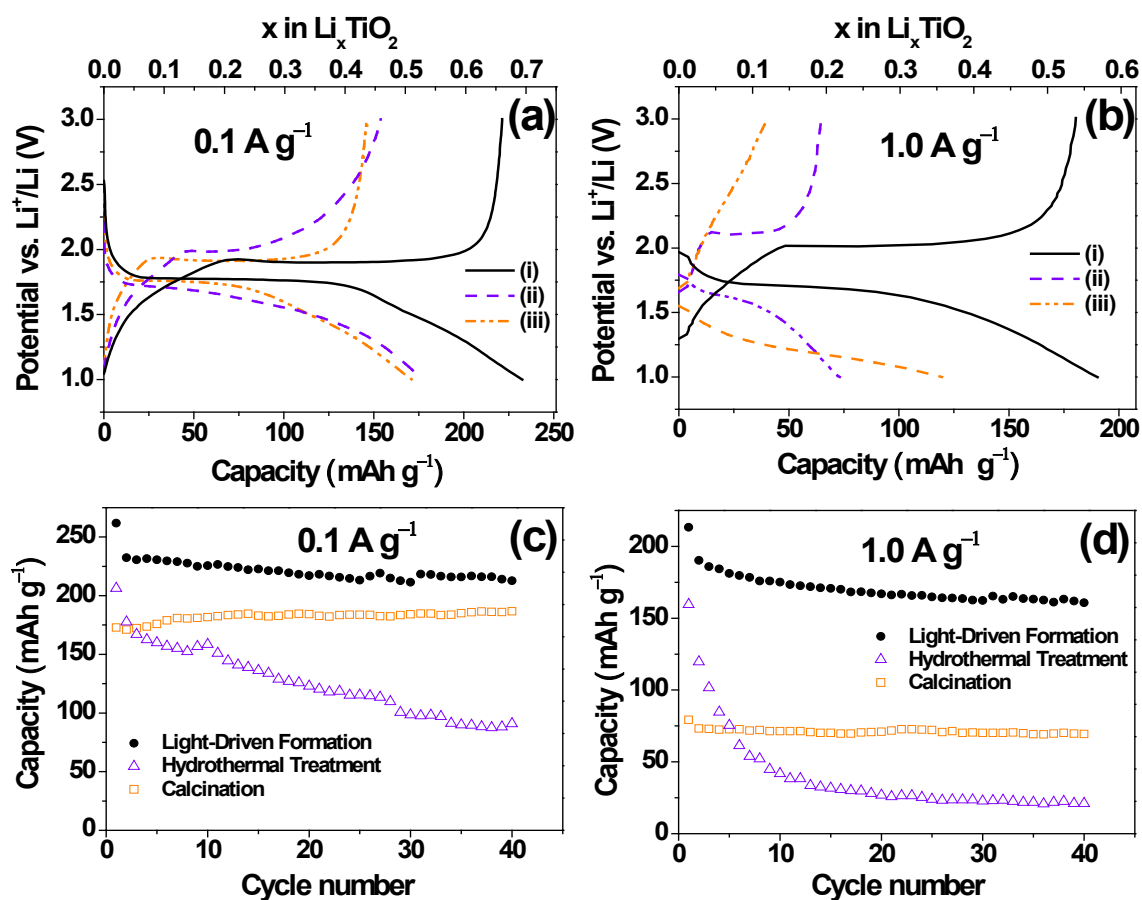

**Fig. S1** The second discharge/charge curves (a,b) and the cycling performance (c,d) of anatase TiO<sub>2</sub> obtained by (i) light-driven formation, (ii) hydrothermal, and (iii) direct calcination methods. The current densities are (a, c) 0.1 A g<sup>-1</sup> and (b,d) 1.0 A g<sup>-1</sup>, respectively.

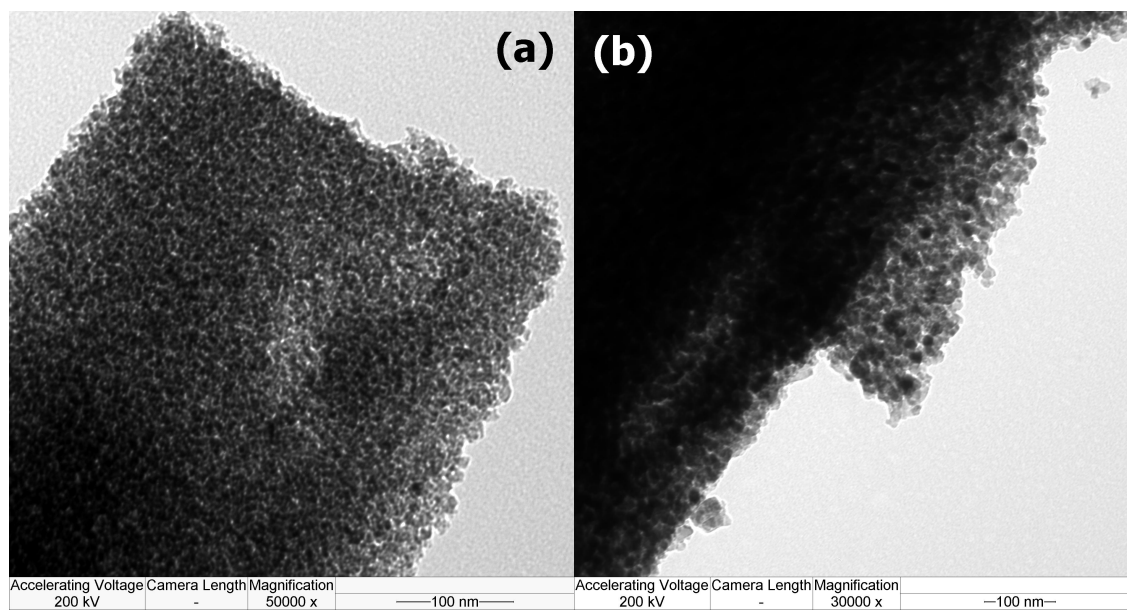

**Fig. S2** TEM images of TiO<sub>2</sub> materials prepared by hydrothermal treatment (a) and direct calcination (b).
